# Supplementary material for: Association between visual classification of kyphosis and future ADL decline in community-dwelling elderly people: the Kurabuchi study
Source: Springer Nature journal article supplement (doi:10.1007/s11657-018-0551-4), 2018-12-18
Supplement: MOESM1 [file 16350112]

Supplemental Table 1 Observer agreements on visual assessment of kyphosis among raters A, B, and C

| Kyphosis Category | Kappa |
|-------------------|-------|
| 1                 | 0.41  |
| 2                 | 0.28  |
| 3                 | 0.29  |
| 4                 | 0.76  |
| combined          | 0.36  |
