# Supplementary material for: Association between visual classification of kyphosis and future ADL decline in community-dwelling elderly people: the Kurabuchi study
Source: Springer Nature journal article supplement (doi:10.1007/s11657-018-0551-4), 2018-12-18
Supplement: MOESM2 [file 16350112]

Supplemental Table 2 Adjusted risk ratios of ADL decline by kyphosis category as assessed by rater B

| Outcome                                 | Kyphosis Category | Outcome |      | Age and sex adjusted RR <sup>†</sup> | 95% CI <sup>**</sup> | Model 1 <sup>§</sup> RR <sup>†</sup> | 95% CI <sup>**</sup> | Model 2 <sup>‡</sup> RR <sup>†</sup> | 95% CI <sup>**</sup> |
|-----------------------------------------|-------------------|---------|------|--------------------------------------|----------------------|--------------------------------------|----------------------|--------------------------------------|----------------------|
|                                         |                   | n/n     | %    |                                      |                      |                                      |                      |                                      |                      |
| Combined ADL Decline <sup>*</sup>       | 1                 | 10/102  | 9.8  | 0.8                                  | 0.4-1.5              | 0.9                                  | 0.4-2.0              | 1.0                                  | 0.4-2.1              |
|                                         | 2                 | 51/285  | 17.9 | 1.0                                  | —                    | 1.0                                  | —                    | 1.0                                  | —                    |
|                                         | 3                 | 14/35   | 40.0 | 1.8                                  | 1.1-3.0              | 1.8                                  | 1.1-3.1              | 1.5                                  | 0.9-2.6              |
|                                         | 4                 | 13/21   | 61.9 | 2.3                                  | 1.4-3.6              | 2.2                                  | 1.3-3.9              | 2.0                                  | 1.1-3.4              |
| Katz ADL decline <sup>*</sup>           | 1                 | 3/102   | 2.9  | 0.4                                  | 0.1-1.4              | 0.4                                  | 0.1-1.7              | 0.4                                  | 0.1-1.9              |
|                                         | 2                 | 29/285  | 10.2 | 1.0                                  | —                    | 1.0                                  | —                    | 1.0                                  | —                    |
|                                         | 3                 | 10/35   | 28.6 | 2.3                                  | 1.2-4.4              | 2.1                                  | 1.0-4.6              | 1.8                                  | 0.8-4.0              |
|                                         | 4                 | 9/21    | 42.9 | 2.7                                  | 1.3-5.4              | 2.9                                  | 1.3-6.7              | 2.5                                  | 1.2-5.6              |
| Admission to Nursing Home <sup>*</sup>  | 1                 | 3/102   | 2.9  | 1.6                                  | 0.5-5.6              | 0.5                                  | 0.1-5.2              | 0.6                                  | 0.1-5.3              |
|                                         | 2                 | 7/285   | 2.5  | 1.0                                  | —                    | 1.0                                  | —                    | 1.0                                  | —                    |
|                                         | 3                 | 3/35    | 8.6  | 2.7                                  | 0.8-9.7              | 2.6                                  | 0.5-12.3             | 3.1                                  | 0.5-19.1             |
|                                         | 4                 | 3/21    | 14.3 | 3.1                                  | 0.9-10.9             | 3.3                                  | 0.9-12.0             | 3.8                                  | 0.7-21.1             |
| Need of assistance at home <sup>*</sup> | 1                 | 9/102   | 8.8  | 1.0                                  | 0.5-1.9              | 1.2                                  | 0.5-2.7              | 1.3                                  | 0.6-2.9              |
|                                         | 2                 | 39/285  | 13.7 | 1.0                                  | —                    | 1.0                                  | —                    | 1.0                                  | —                    |
|                                         | 3                 | 11/35   | 31.4 | 1.8                                  | 1.0-3.3              | 1.9                                  | 1.1-3.5              | 1.6                                  | 0.9-3.0              |
|                                         | 4                 | 13/21   | 61.9 | 2.9                                  | 1.8-4.8              | 2.8                                  | 1.6-5.0              | 2.4                                  | 1.3-4.4              |
| Death                                   | 1                 | 4/106   | 3.8  | 0.5                                  | 0.2-1.4              | 0.7                                  | 0.3-1.9              | 0.9                                  | 0.3-2.8              |
|                                         | 2                 | 32/317  | 10.1 | 1.0                                  | —                    | 1.0                                  | —                    | 1.0                                  | —                    |
|                                         | 3                 | 4/39    | 10.3 | 0.9                                  | 0.3-2.4              | 1.0                                  | 0.3-3.6              | 1.1                                  | 0.3-4.1              |
|                                         | 4                 | 2/23    | 8.7  | 0.6                                  | 0.1-2.3              | 0.4                                  | 0.1-2.6              | 0.5                                  | 0.1-3.8              |

Notes:

<sup>\*</sup> Participants who died during the follow-up period (n=42) were excluded from the analysis.

<sup>†</sup> RR: risk ratio.

<sup>\*\*</sup> CI: confidence interval.

<sup>§</sup> Adjusted for age category, sex, marital status, education, drinking, smoking, BMI, vision impairment, hearing handicap, knee joint pain, depressive symptoms, and history of life-threatening diseases (stroke, coronary heart disease, diabetes mellitus, cancer).

<sup>‡</sup> In addition to the variables adjusted for in Model 1, back pain and bone stiffness categories are included.
