# Supplementary material for: Association between visual classification of kyphosis and future ADL decline in community-dwelling elderly people: the Kurabuchi study
Source: Springer Nature journal article supplement (doi:10.1007/s11657-018-0551-4), 2018-12-18
Supplement: MOESM3 [file 16350112]

Supplemental Table 3 Adjusted risk ratios of ADL decline by kyphosis category as assessed by rater C

| Outcome                     | Kyphosis Category | Outcome |      | Age and sex adjusted RR <sup>†</sup> | 95% CI <sup>**</sup> | Model 1 <sup>§</sup> RR <sup>†</sup> | 95% CI <sup>**</sup> | Model 2 <sup>‡</sup> RR <sup>†</sup> | 95% CI <sup>**</sup> |
|-----------------------------|-------------------|---------|------|--------------------------------------|----------------------|--------------------------------------|----------------------|--------------------------------------|----------------------|
|                             |                   | n/n     | %    |                                      |                      |                                      |                      |                                      |                      |
| Combined ADL Decline*       | 1                 | 11/106  | 10.4 | 0.7                                  | 0.4-1.3              | 0.7                                  | 0.3-1.6              | 0.8                                  | 0.3-1.7              |
|                             | 2                 | 38/183  | 20.8 | 1.0                                  | —                    | 1.0                                  | —                    | 1.0                                  | —                    |
|                             | 3                 | 16/48   | 33.3 | 1.6                                  | 0.9-2.7              | 1.8                                  | 1.0-3.3              | 1.6                                  | 0.8-3.0              |
|                             | 4                 | 12/23   | 52.1 | 1.9                                  | 1.1-3.3              | 2.1                                  | 1.1-4.2              | 1.8                                  | 0.9-3.6              |
| Katz ADL decline*           | 1                 | 6/106   | 5.7  | 0.7                                  | 0.3-1.6              | 0.6                                  | 0.2-1.7              | 0.6                                  | 0.2-1.8              |
|                             | 2                 | 23/183  | 12.6 | 1.0                                  | —                    | 1.0                                  | —                    | 1.0                                  | —                    |
|                             | 3                 | 11/48   | 22.9 | 1.8                                  | 0.9-3.5              | 1.8                                  | 0.8-4.3              | 1.5                                  | 0.6-3.7              |
|                             | 4                 | 7/23    | 30.4 | 1.8                                  | 0.9-4.0              | 1.8                                  | 0.6-5.1              | 1.5                                  | 0.5-4.3              |
| Admission to Nursing Home*  | 1                 | 3/106   | 2.8  | 0.8                                  | 0.3-2.4              | 0.0                                  | — <sup>#</sup>       | 0.0                                  | — <sup>#</sup>       |
|                             | 2                 | 8/183   | 4.4  | 1.0                                  | —                    | 1.0                                  | —                    | 1.0                                  | —                    |
|                             | 3                 | 3/48    | 6.3  | 1.6                                  | 0.4-6.6              | 2.8                                  | 0.5-15.9             | 3.0                                  | 0.5-16.5             |
|                             | 4                 | 3/23    | 13.0 | 2.3                                  | 0.6-8.9              | 4.3                                  | 0.9-20.9             | 3.9                                  | 0.4-34.0             |
| Need of assistance at home* | 1                 | 9/106   | 8.5  | 0.9                                  | 0.5-1.9              | 1.0                                  | 0.4-2.3              | 1.0                                  | 0.4-2.5              |
|                             | 2                 | 25/183  | 12.7 | 1.0                                  | —                    | 1.0                                  | —                    | 1.0                                  | —                    |
|                             | 3                 | 13/48   | 28.1 | 1.9                                  | 1.0-3.7              | 1.9                                  | 0.9-3.8              | 1.7                                  | 0.8-3.5              |
|                             | 4                 | 12/23   | 52.1 | 2.8                                  | 1.4-5.3              | 2.9                                  | 1.3-5.9              | 2.4                                  | 1.1-5.1              |
| Death                       | 1                 | 3/109   | 2.8  | 0.4                                  | 0.1-1.6              | 0.5                                  | 0.1-2.3              | 0.5                                  | 0.1-2.2              |
|                             | 2                 | 21/204  | 10.3 | 1.0                                  | —                    | 1.0                                  | —                    | 1.0                                  | —                    |
|                             | 3                 | 8/56    | 14.3 | 1.3                                  | 0.6-2.8              | 1.4                                  | 0.6-3.7              | 1.4                                  | 0.5-3.8              |
|                             | 4                 | 4/27    | 14.8 | 1.0                                  | 0.3-2.7              | 1.7                                  | 0.5-5.6              | 1.5                                  | 0.5-5.1              |

Notes:

\* Participants who died during the follow-up period (n=36) were excluded from the analysis.

<sup>†</sup>RR: risk ratio.

<sup>\*\*</sup>CI: confidence interval.

<sup>§</sup>Adjusted for age category, sex, marital status, education, drinking, smoking, BMI, vision impairment, hearing handicap, knee joint pain, depressive symptoms, and history of life-threatening diseases (stroke, coronary heart disease, diabetes mellitus, cancer).

<sup>‡</sup>In addition to the variables adjusted for in Model 1, back pain and bone stiffness categories are included.

<sup>#</sup>Due to lack of outcome data, statistical computation was impossible.
